# Supplementary material for: Methods for estimating complier average causal effects for cost‐effectiveness analysis
Source: PubMed Central journal article supplement (PMC5763423; doi:10.1111/rssa.12294), 2017-05-24
Supplement: RSSA-181-277-s001.pdf [file RSSA-181-277-s001.pdf]

# Methods for estimating complier-average causal effects for cost-effectiveness analysis

K. DiazOrdaz, A. J. Franchini, R. Grieve

## 1 Sensitivity analyses for the REFLUX RCT

Our motivating example trial had over 50% missing cost-effectiveness outcomes, with a few missing data in the baseline covariate. As primary analysis, we performed MI and full Bayesian analyses, that intrinsically obtain a predictive posterior distribution for these missing values, and reported the results of these analyses in the main text.

As a sensitivity to the MAR assumption, we present here the complete case analysis (N=172) of the REFLUX RCT, adjusting for baseline EQ5D. The results are valid if conditional on baseline EQ5D, the missing data mechanism is independent of the outcomes.

Table A1: Estimated cost-effectiveness for the REFLUX RCT, over a time horizon of five years according to ITT and alternative methods for estimating the CACE based on complete cases. Treatment switches are defined within the first year post randomisation. Costs and INB numbers rounded to the nearest integer.

| <b>Incremental costs, QALYs and INB of surgery vs medicine</b> |        |                       |
|----------------------------------------------------------------|--------|-----------------------|
| Outcome                                                        | Method | estimate ( 95% CI )   |
| <b>Incremental cost</b>                                        |        |                       |
|                                                                | ITT    | 1626 (1098, 2153)     |
|                                                                | 2sls   | 2102 (1484, 2720)     |
|                                                                | 3sls   | 2102 (1484, 2720)     |
|                                                                | uBN    | 2112 (1401, 2879)     |
|                                                                | uBGN   | 2195 (1481, 3065)     |
|                                                                | BFL    | 2081 (1457, 2705)     |
| <b>Incremental QALYs</b>                                       |        |                       |
|                                                                | ITT    | 0.319 (−0.055, 0.694) |
|                                                                | 2sls   | 0.412 (0.137, 0.688)  |
|                                                                | 3sls   | 0.412 (0.137, 0.688)  |
|                                                                | uBN    | 0.413 (0.136, 0.704)  |
|                                                                | uBGN   | 0.285 (−0.066, 0.629) |
|                                                                | BFL    | 0.414 (0.135, 0.703)  |
| <b>INB</b>                                                     |        |                       |
|                                                                | ITT    | 7948. (−3259, 19155)  |
|                                                                | 2sls   | 10275 (1997, 18554)   |
|                                                                | 3sls   | 10275 (1828, 18724)   |
|                                                                | uBN    | 10280, (1947, 18980)  |
|                                                                | uBGN   | 6362 − 4497, 16941)   |
|                                                                | BFL    | 10353 (1789, 19165)   |

As can be seen in Table A1, the conclusions each model reaches are not substantially changed from those under MAR (either using MI or full Bayesian), presented in the main text.

### 1.1 Sensitivity analysis of the BFL to choice of priors

We now study the sensitivity of the BFL model to the choice of priors for the parameters in the model. Recall that this model can be written as

$$\begin{pmatrix} D_i \\ Y_{1i} \\ Y_{2i} \end{pmatrix} \sim N \left\{ \begin{pmatrix} \mu_{0i} \\ \mu_{1i} \\ \mu_{2i} \end{pmatrix}, \Sigma \right\} \quad \Sigma = \begin{pmatrix} \sigma_0^2 & s_{01} & s_{02} \\ s_{01} & \sigma_1^2 & s_{12} \\ s_{02} & s_{12} & \sigma_2^2 \end{pmatrix} \quad (1)$$

where  $s_{ij} = \text{cov}(Y_i, Y_j)$ , and

$$\begin{aligned} \mu_{0i} &= \beta_{0,0} + \beta_{1,0}Z_i \\ \mu_{1i} &= \beta_{0,1} + \beta_{1,1}\beta_{1,0}Z_i \\ \mu_{2i} &= \beta_{0,2} + \beta_{1,2}\beta_{1,0}Z_i \end{aligned} \quad (2)$$

Originally, we chose normal priors for the regression coefficients,  $\beta_{m,j} \sim N(0, 10^2)$ , for  $j \in \{0, 1, 2\}$ ,  $m \in \{0, 1\}$ , and a Wishart prior for the inverse of  $\Sigma$  (Gelman and Hill, 2006).

Here, we first vary the prior distribution for  $\Sigma$ , and assume a structured covariance matrix (see Congdon (2007) example 5.8, and Lunn et al. (2012), example 9.1.4). Thus, we write:

$$\Sigma = \begin{pmatrix} s_{00}s_{00} & \rho_1 s_{00}s_{11} & \rho_2 s_{00}s_{22} \\ \rho_1 s_{00}s_{11} & s_{11}s_{11} & \rho_3 s_{11}s_{22} \\ \rho_2 s_{00}s_{22} & \rho_3 s_{11}s_{22} & s_{22}s_{22} \end{pmatrix} \quad (3)$$

and assumed the following priors

$$s_{ij} \sim N(0, 10^2), \quad \rho_j \sim \text{Unif}[-1, 1] \quad (4)$$

In a secondary sensitivity analysis, we assume a Wishart prior for  $\Sigma$  as before, but used uniform priors for the regression coefficients,  $\beta_{m,j} \sim \text{Unif}[-10, 10]$ , for  $j \in \{0, 1, 2\}$ ,  $m \in \{0, 1\}$ . We did these changes on both available cases and complete cases. The results corresponding to INB are reported in Table A2.

Table A2: Results from sensitivity analysis of the BFL to prior specifications for the INB of the motivating example: CEA within the REFLUX trial. INB reported to the nearest integer, in Great British Pounds (GBP).

| Data            | Priors                                                                      | INB estimate | 95% CI        |
|-----------------|-----------------------------------------------------------------------------|--------------|---------------|
| Available cases | Structured precision matrix <sup>1</sup><br>normal priors for $\beta_{m,j}$ | 10421        | (1878, 19187) |
| Available cases | Wishart prior for the precision<br>Unif prior for $\beta_{m,j}$             | 10405        | (1733, 19330) |
| Complete cases  | Structured precision matrix<br>normal priors for $\beta_{m,j}$              | 10425        | (1792, 19156) |
| Complete cases  | Wishart prior for the precision<br>Unif prior for $\beta_{m,j}$             | 10428        | (1894, 19279) |

<sup>1</sup> Following the specifications of equation (4) in this Appendix.

## 2 Supplementary Results from the simulations

Figure A1: Median Bias for scenarios with 70% non-compliance and sample sizes of (a)  $n = 100$  (top) and (b)  $n = 1000$ . Results are stratified by cost distribution, and correlation between cost and QALYs. The dotted line represents zero bias. Results for 2sls (not plotted) are identical to those for 3sls; uBGN was not applied to Normal cost data.

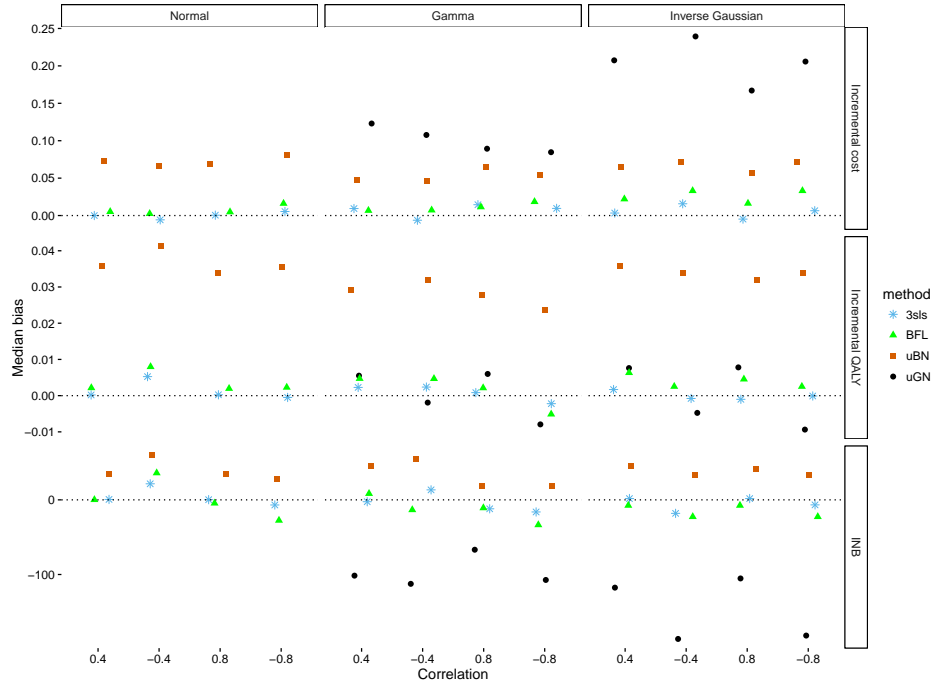

(a)  $n=100$

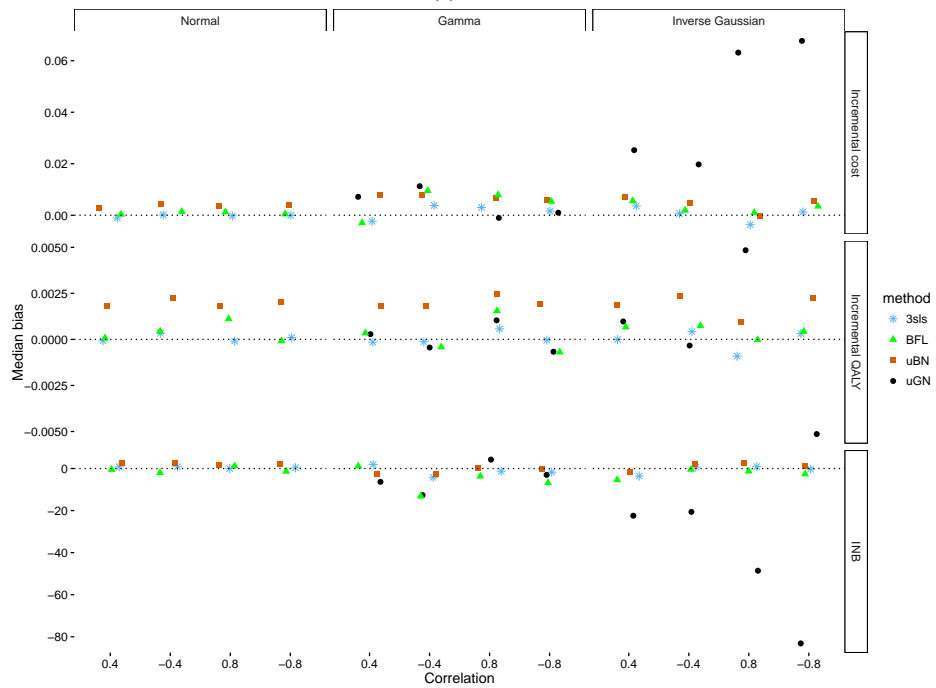

(b)  $n=1000$

Table A3: CI Coverage rates and median width for incremental Cost, QALYs, and INB, across scenarios with 30% non-compliance, moderate correlation between outcomes and sample size  $n = 1000$ . uBGN was not applied in settings with normal cost data.

| Cost distribution       | $\rho$ | 2sls     |       | 3sls     |       | uBN      |       | uBGN     |       | BFL      |       |
|-------------------------|--------|----------|-------|----------|-------|----------|-------|----------|-------|----------|-------|
|                         |        | coverage | width | coverage | width | coverage | width | coverage | width | coverage | width |
| <b>Normal</b>           |        |          |       |          |       |          |       |          |       |          |       |
| <b>Cost</b>             |        |          |       |          |       |          |       |          |       |          |       |
|                         | 0.4    | 0.949    | 0.072 | 0.949    | 0.072 | 0.989    | 0.094 |          |       | 0.956    | 0.075 |
|                         | -0.4   | 0.957    | 0.072 | 0.957    | 0.072 | 0.992    | 0.097 |          |       | 0.963    | 0.075 |
| <b>QALYs</b>            |        |          |       |          |       |          |       |          |       |          |       |
|                         | 0.4    | 0.942    | 0.036 | 0.942    | 0.036 | 0.982    | 0.046 |          |       | 0.937    | 0.035 |
|                         | -0.4   | 0.947    | 0.036 | 0.947    | 0.036 | 0.991    | 0.048 |          |       | 0.944    | 0.035 |
| <b>INB</b>              |        |          |       |          |       |          |       |          |       |          |       |
|                         | 0.4    | 0.986    | 129   | 0.951    | 102   | 0.977    | 120   |          |       | 0.950    | 101   |
|                         | -0.4   | 0.920    | 129   | 0.956    | 150   | 0.962    | 155   |          |       | 0.949    | 149   |
| <b>Gamma</b>            |        |          |       |          |       |          |       |          |       |          |       |
| <b>Cost</b>             |        |          |       |          |       |          |       |          |       |          |       |
|                         | 0.4    | 0.949    | 0.240 | 0.949    | 0.240 | 0.955    | 0.246 | 0.943    | 0.235 | 0.951    | 0.242 |
|                         | -0.4   | 0.953    | 0.240 | 0.953    | 0.240 | 0.958    | 0.248 | 0.945    | 0.235 | 0.954    | 0.243 |
| <b>QALYs</b>            |        |          |       |          |       |          |       |          |       |          |       |
|                         | 0.4    | 0.947    | 0.036 | 0.947    | 0.036 | 0.990    | 0.048 | 0.946    | 0.036 | 0.943    | 0.035 |
|                         | -0.4   | 0.950    | 0.036 | 0.950    | 0.036 | 0.993    | 0.048 | 0.949    | 0.036 | 0.950    | 0.036 |
| <b>INB</b>              |        |          |       |          |       |          |       |          |       |          |       |
|                         | 0.4    | 0.985    | 262   | 0.950    | 221   | 0.957    | 229   | 0.944    | 218   | 0.949    | 221   |
|                         | -0.4   | 0.920    | 262   | 0.952    | 297   | 0.932    | 276   | 0.946    | 292   | 0.954    | 301   |
| <b>Inverse Gaussian</b> |        |          |       |          |       |          |       |          |       |          |       |
| <b>Cost</b>             |        |          |       |          |       |          |       |          |       |          |       |
|                         | 0.4    | 0.949    | 0.283 | 0.949    | 0.283 | 0.958    | 0.290 | 0.902    | 0.248 | 0.947    | 0.281 |
|                         | -0.4   | 0.952    | 0.283 | 0.952    | 0.283 | 0.957    | 0.291 | 0.901    | 0.249 | 0.946    | 0.277 |
| <b>QALYs</b>            |        |          |       |          |       |          |       |          |       |          |       |
|                         | 0.4    | 0.954    | 0.036 | 0.954    | 0.036 | 0.990    | 0.048 | 0.942    | 0.035 | 0.967    | 0.038 |
|                         | -0.4   | 0.949    | 0.036 | 0.949    | 0.036 | 0.989    | 0.048 | 0.942    | 0.035 | 0.961    | 0.038 |
| <b>INB</b>              |        |          |       |          |       |          |       |          |       |          |       |
|                         | 0.4    | 0.976    | 303   | 0.956    | 263   | 0.958    | 268   | 0.914    | 235   | 0.958    | 268   |
|                         | -0.4   | 0.922    | 302   | 0.950    | 336   | 0.932    | 315   | 0.906    | 300   | 0.947    | 333   |

Table A4: CI Coverage rates and median width for incremental Cost, QALYs, and INB, across scenarios with 70% non-compliance, moderate correlation between outcomes and sample size  $n = 100$ . uBGN was not applied in settings with normal cost data.

| Cost distribution       | $\rho$      | 2sls     |       | 3sls     |       | uBN      |       | uBGN     |       | BFL      |       |
|-------------------------|-------------|----------|-------|----------|-------|----------|-------|----------|-------|----------|-------|
|                         |             | coverage | width | coverage | width | coverage | width | coverage | width | coverage | width |
| <b>Normal</b>           | <b>Cost</b> |          |       |          |       |          |       |          |       |          |       |
|                         | 0.4         | 0.968    | 0.550 | 0.968    | 0.550 | 0.988    | 1.33  | 0.991    | 1.13  | 0.991    | 1.13  |
|                         | -0.4        | 0.966    | 0.545 | 0.966    | 0.545 | 0.990    | 1.30  | 0.985    | 1.08  | 0.985    | 1.08  |
| <b>QALYs</b>            | 0.4         | 0.968    | 0.271 | 0.968    | 0.271 | 0.988    | 0.665 | 0.964    | 0.445 | 0.964    | 0.445 |
|                         | -0.4        | 0.964    | 0.269 | 0.964    | 0.269 | 0.986    | 0.665 | 0.954    | 0.435 | 0.954    | 0.435 |
| <b>INB</b>              | 0.4         | 0.992    | 981   | 0.966    | 771   | 0.985    | 1453  | 0.981    | 1411  | 0.981    | 1411  |
|                         | -0.4        | 0.917    | 973   | 0.966    | 1131  | 0.957    | 1788  | 0.958    | 1912  | 0.958    | 1912  |
| <b>Gamma</b>            | <b>Cost</b> |          |       |          |       |          |       |          |       |          |       |
|                         | 0.4         | 0.966    | 1.68  | 0.966    | 1.68  | 0.964    | 2.640 | 0.944    | 2.21  | 0.960    | 2.73  |
|                         | -0.4        | 0.969    | 1.69  | 0.969    | 1.69  | 0.965    | 2.690 | 0.950    | 2.21  | 0.964    | 2.71  |
| <b>QALYs</b>            | 0.4         | 0.972    | 0.267 | 0.972    | 0.267 | 0.994    | 0.624 | 0.959    | 0.348 | 0.965    | 0.42  |
|                         | -0.4        | 0.965    | 0.269 | 0.965    | 0.269 | 0.987    | 0.625 | 0.954    | 0.351 | 0.954    | 0.42  |
| <b>INB</b>              | 0.4         | 0.988    | 1870  | 0.966    | 1557  | 0.964    | 2456  | 0.947    | 2041  | 0.970    | 2503  |
|                         | -0.4        | 0.939    | 1876  | 0.971    | 2138  | 0.947    | 2984  | 0.958    | 2774  | 0.962    | 3344  |
| <b>Inverse Gaussian</b> | <b>Cost</b> |          |       |          |       |          |       |          |       |          |       |
|                         | 0.4         | 0.965    | 1.92  | 0.965    | 1.92  | 0.967    | 3.04  | 0.912    | 2.29  | 0.972    | 3.31  |
|                         | -0.4        | 0.958    | 1.90  | 0.958    | 1.90  | 0.966    | 3.05  | 0.910    | 2.30  | 0.968    | 3.37  |
| <b>QALYs</b>            | 0.4         | 0.967    | 0.268 | 0.967    | 0.268 | 0.988    | 0.637 | 0.948    | 0.355 | 1        | 0.766 |
|                         | -0.4        | 0.966    | 0.271 | 0.966    | 0.271 | 0.990    | 0.631 | 0.945    | 0.359 | 0.999    | 0.774 |
| <b>INB</b>              | 0.4         | 0.990    | 2082  | 0.961    | 1777  | 0.963    | 2827  | 0.912    | 2157  | 0.991    | 3554  |
|                         | -0.4        | 0.936    | 2071  | 0.970    | 2335  | 0.912    | 3389  | 0.924    | 2855  | 0.979    | 4819  |

Table A5: CI Coverage rates and median width for incremental Cost, QALYs, and INB, across scenarios with 70% non-compliance, moderate correlation between outcomes and sample size  $n = 1000$ . uBGN was not applied in settings with normal cost data.

| Cost distribution       | $\rho$ | 2sls     |       | 3sls     |        | uBN      |       | uBGN     |       | BFL      |        |
|-------------------------|--------|----------|-------|----------|--------|----------|-------|----------|-------|----------|--------|
|                         |        | coverage | width | coverage | width  | coverage | width | coverage | width | coverage | width  |
| <b>Normal</b>           |        |          |       |          |        |          |       |          |       |          |        |
| <b>Cost</b>             |        |          |       |          |        |          |       |          |       |          |        |
|                         | 0.4    | 0.954    | 0.169 | 0.954    | 0.169  | 0.986    | 0.223 |          |       | 0.958    | 0.178  |
|                         | -0.4   | 0.953    | 0.169 | 0.953    | 0.169  | 0.991    | 0.230 |          |       | 0.960    | 0.179  |
| <b>QALYs</b>            |        |          |       |          |        |          |       |          |       |          |        |
|                         | 0.4    | 0.946    | 0.083 | 0.946    | 0.083  | 0.986    | 0.111 |          |       | 0.942    | 0.084  |
|                         | -0.4   | 0.953    | 0.083 | 0.953    | 0.083  | 0.992    | 0.115 |          |       | 0.947    | 0.083  |
| <b>INB</b>              |        |          |       |          |        |          |       |          |       |          |        |
|                         | 0.4    | 0.986    | 301   | 0.948    | 238    | 0.976    | 287   |          |       | 0.944    | 240    |
|                         | -0.4   | 0.909    | 301   | 0.944    | 349    | 0.953    | 368   |          |       | 0.942    | 356    |
| <b>Gamma</b>            |        |          |       |          |        |          |       |          |       |          |        |
| <b>Cost</b>             |        |          |       |          |        |          |       |          |       |          |        |
|                         | 0.4    | 0.952    | 0.526 | 0.952    | 0.526  | 0.958    | 0.556 | 0.939    | 0.523 | 0.952    | 0.541  |
|                         | -0.4   | 0.952    | 0.525 | 0.952    | 0.525  | 0.958    | 0.556 | 0.943    | 0.524 | 0.952    | 0.541  |
| <b>QALYs</b>            |        |          |       |          |        |          |       |          |       |          |        |
|                         | 0.4    | 0.951    | 0.083 | 0.951    | 0.0832 | 0.995    | 0.115 | 0.947    | 0.085 | 0.949    | 0.084  |
|                         | -0.4   | 0.955    | 0.083 | 0.955    | 0.0832 | 0.995    | 0.115 | 0.954    | 0.084 | 0.955    | 0.085  |
| <b>INB</b>              |        |          |       |          |        |          |       |          |       |          |        |
|                         | 0.4    | 0.980    | 582   | 0.954    | 486    | 0.932    | 626   | 0.946    | 487   | 0.951    | 496    |
|                         | -0.4   | 0.916    | 581   | 0.953    | 661    | 0.932    | 626   | 0.944    | 662   | 0.953    | 678    |
| <b>Inverse Gaussian</b> |        |          |       |          |        |          |       |          |       |          |        |
| <b>Cost</b>             |        |          |       |          |        |          |       |          |       |          |        |
|                         | 0.4    | 0.952    | 0.595 | 0.952    | 0.595  | 0.959    | 0.621 | 0.909    | 0.538 | 0.950    | 0.603  |
|                         | -0.4   | 0.946    | 0.955 | 0.599    | 0.955  | 0.599    | 0.629 | 0.910    | 0.542 | 0.948    | 0.599  |
| <b>QALYs</b>            |        |          |       |          |        |          |       |          |       |          |        |
|                         | 0.4    | 0.943    | 0.083 | 0.943    | 0.083  | 0.991    | 0.114 | 0.938    | 0.084 | 0.959    | 0.0918 |
|                         | -0.4   | 0.083    | 0.946 | 0.083    | 0.96   | 0.988    | 0.115 | 0.942    | 0.084 | 0.957    | 0.0905 |
| <b>INB</b>              |        |          |       |          |        |          |       |          |       |          |        |
|                         | 0.4    | 0.975    | 645   | 0.952    | 552    | 0.954    | 577   | 0.918    | 510   | 0.953    | 571    |
|                         | -0.4   | 0.920    | 649   | 0.952    | 728    | 0.93     | 692   | 0.914    | 668   | 0.950    | 736    |

Table A6: CI Coverage rates and median width for incremental Cost, QALYs, and INB, across scenarios with 30% non-compliance, high correlation between outcomes and sample size  $n = 100$ . uBGN was not applied in settings with normal cost data.

| Cost distribution       | $\rho$ | 2sls     |       | 3sls     |       | uBN      |       | uBGN     |       | BFL      |       |
|-------------------------|--------|----------|-------|----------|-------|----------|-------|----------|-------|----------|-------|
|                         |        | coverage | width | coverage | width | coverage | width | coverage | width | coverage | width |
| <b>Normal</b>           |        |          |       |          |       |          |       |          |       |          |       |
| <b>Cost</b>             |        |          |       |          |       |          |       |          |       |          |       |
|                         | 0.8    | 0.951    | 0.229 | 0.951    | 0.229 | 0.984    | 0.299 |          |       | 0.987    | 0.299 |
|                         | -0.8   | 0.946    | 0.228 | 0.946    | 0.228 | 0.992    | 0.324 |          |       | 0.986    | 0.295 |
| <b>QALYs</b>            |        |          |       |          |       |          |       |          |       |          |       |
|                         | 0.8    | 0.954    | 0.113 | 0.954    | 0.113 | 0.985    | 0.148 |          |       | 0.958    | 0.122 |
|                         | -0.8   | 0.949    | 0.112 | 0.949    | 0.112 | 0.992    | 0.162 |          |       | 0.952    | 0.121 |
| <b>INB</b>              |        |          |       |          |       |          |       |          |       |          |       |
|                         | 0.8    | 0.999    | 408   | 0.953    | 207   | 0.998    | 373   |          |       | 0.990    | 279   |
|                         | -0.8   | 0.867    | 407   | 0.947    | 533   | 0.93     | 514   |          |       | 0.957    | 585   |
| <b>Gamma</b>            |        |          |       |          |       |          |       |          |       |          |       |
| <b>Cost</b>             |        |          |       |          |       |          |       |          |       |          |       |
|                         | 0.8    | 0.955    | 0.757 | 0.955    | 0.757 | 0.947    | 0.764 | 0.922    | 0.681 | 0.961    | 0.822 |
|                         | -0.8   | 0.946    | 0.757 | 0.946    | 0.757 | 0.954    | 0.825 | 0.947    | 0.820 | 0.951    | 0.817 |
| <b>QALYs</b>            |        |          |       |          |       |          |       |          |       |          |       |
|                         | 0.8    | 0.952    | 0.113 | 0.952    | 0.113 | 0.986    | 0.152 | 0.928    | 0.109 | 0.957    | 0.123 |
|                         | -0.8   | 0.947    | 0.113 | 0.947    | 0.113 | 0.99     | 0.162 | 0.950    | 0.121 | 0.954    | 0.123 |
| <b>INB</b>              |        |          |       |          |       |          |       |          |       |          |       |
|                         | 0.8    | 0.999    | 828   | 0.955    | 539   | 0.99     | 707   | 0.942    | 528   | 0.966    | 596   |
|                         | -0.8   | 0.884    | 831   | 0.945    | 1041  | 0.901    | 920   | 0.882    | 902   | 0.95     | 1118  |
| <b>Inverse Gaussian</b> |        |          |       |          |       |          |       |          |       |          |       |
| <b>Cost</b>             |        |          |       |          |       |          |       |          |       |          |       |
|                         | 0.8    | 0.954    | 0.883 | 0.954    | 0.883 | 0.948    | 0.894 | 0.836    | 0.745 | 0.961    | 0.956 |
|                         | -0.8   | 0.953    | 0.884 | 0.953    | 0.884 | 0.961    | 0.956 | 0.826    | 0.750 | 0.955    | 0.938 |
| <b>QALYs</b>            |        |          |       |          |       |          |       |          |       |          |       |
|                         | 0.8    | 0.954    | 0.113 | 0.954    | 0.113 | 0.989    | 0.154 | 0.900    | 0.108 | 1        | 0.204 |
|                         | -0.8   | 0.951    | 0.113 | 0.951    | 0.113 | 0.993    | 0.163 | 0.916    | 0.108 | 1        | 0.204 |
| <b>INB</b>              |        |          |       |          |       |          |       |          |       |          |       |
|                         | 0.8    | 0.994    | 947   | 0.952    | 674   | 0.978    | 825   | 0.837    | 591   | 0.990    | 877   |
|                         | -0.8   | 0.893    | 948   | 0.953    | 1155  | 0.910    | 1042  | 0.842    | 993   | 0.969    | 1307  |

Table A7: CI Coverage rates and median width for incremental Cost, QALYs, and INB, across scenarios with 30% non-compliance, high correlation between outcomes and sample size  $n = 1000$ . uBGN was not applied in settings with normal cost data.

| Cost distribution       | $\rho$ | 2sls     |        |       | 3sls     |        |       | uBN      |       |       | uBGN     |       |       | BFL      |       |       |
|-------------------------|--------|----------|--------|-------|----------|--------|-------|----------|-------|-------|----------|-------|-------|----------|-------|-------|
|                         |        | coverage | width  | width | coverage | width  | width | coverage | width | width | coverage | width | width | coverage | width | width |
| <b>Normal</b>           |        |          |        |       |          |        |       |          |       |       |          |       |       |          |       |       |
| <b>Cost</b>             |        |          |        |       |          |        |       |          |       |       |          |       |       |          |       |       |
|                         | 0.8    | .949     | 0.072  | 0.949 | 0.072    | 0.072  | 0.985 | 0.089    |       |       |          |       |       |          | 0.951 | 0.074 |
|                         | -0.8   | 0.954    | 0.072  | 0.954 | 0.072    | 0.072  | 0.996 | 0.097    |       |       |          |       |       |          | 0.955 | 0.074 |
| <b>QALYs</b>            |        |          |        |       |          |        |       |          |       |       |          |       |       |          |       |       |
|                         | 0.8    | 0.943    | 0.036  | 0.943 | 0.036    | 0.036  | 0.988 | 0.044    |       |       |          |       |       |          | 0.938 | 0.035 |
|                         | -0.8   | 0.952    | 0.036  | 0.952 | 0.036    | 0.036  | 0.992 | 0.048    |       |       |          |       |       |          | 0.951 | 0.036 |
| <b>INB</b>              |        |          |        |       |          |        |       |          |       |       |          |       |       |          |       |       |
|                         | 0.8    | 1        | 129    | 0.95  | 65.4     | 112    | 1     | 112      |       |       |          |       |       |          | 0.946 | 66.3  |
|                         | -0.8   | 0.864    | 129    | 0.952 | 168.4    | 154    | 0.928 | 154      |       |       |          |       |       |          | 0.946 | 170.2 |
| <b>Gamma</b>            |        |          |        |       |          |        |       |          |       |       |          |       |       |          |       |       |
| <b>Cost</b>             |        |          |        |       |          |        |       |          |       |       |          |       |       |          |       |       |
|                         | 0.8    | 0.946    | 0.240  | 0.946 | 0.240    | 0.240  | 0.938 | 0.230    |       |       |          |       |       |          | 0.944 | 0.239 |
|                         | -0.8   | 0.949    | 0.240  | 0.949 | 0.240    | 0.240  | 0.955 | 0.249    |       |       |          |       |       |          | 0.950 | 0.241 |
| <b>QALYs</b>            |        |          |        |       |          |        |       |          |       |       |          |       |       |          |       |       |
|                         | 0.8    | 0.948    | 0.036  | 0.948 | 0.036    | 0.036  | 0.983 | 0.045    |       |       |          |       |       |          | 0.946 | 0.035 |
|                         | -0.8   | 0.952    | 0.036  | 0.952 | 0.036    | 0.036  | 0.990 | 0.048    |       |       |          |       |       |          | 0.950 | 0.036 |
| <b>INB</b>              |        |          |        |       |          |        |       |          |       |       |          |       |       |          |       |       |
|                         | 0.8    | 0.996    | 263    | 0.950 | 172      | 213    | 0.982 | 213      |       |       |          |       |       |          | 0.948 | 172   |
|                         | -0.8   | 0.883    | 263    | 0.946 | 329      | 277    | 0.899 | 277      |       |       |          |       |       |          | 0.946 | 330   |
| <b>Inverse Gaussian</b> |        |          |        |       |          |        |       |          |       |       |          |       |       |          |       |       |
| <b>Cost</b>             |        |          |        |       |          |        |       |          |       |       |          |       |       |          |       |       |
|                         | 0.8    | 0.946    | 0.283  | 0.946 | 0.283    | 0.283  | 0.936 | 0.271    |       |       |          |       |       |          | 0.942 | 0.279 |
|                         | -0.8   | 0.952    | 0.283  | 0.952 | 0.283    | 0.283  | 0.955 | 0.290    |       |       |          |       |       |          | 0.950 | 0.280 |
| <b>QALYs</b>            |        |          |        |       |          |        |       |          |       |       |          |       |       |          |       |       |
|                         | 0.8    | 0.950    | 0.0356 | 0.95  | 0.0356   | 0.0356 | 0.986 | 0.0457   |       |       |          |       |       |          | 0.964 | 0.038 |
|                         | -0.8   | 0.944    | 0.0356 | 0.944 | 0.0356   | 0.0356 | 0.990 | 0.048    |       |       |          |       |       |          | 0.965 | 0.038 |
| <b>INB</b>              |        |          |        |       |          |        |       |          |       |       |          |       |       |          |       |       |
|                         | 0.8    | 0.994    | 303    | 0.952 | 218      | 250    | 0.972 | 250      |       |       |          |       |       |          | 0.954 | 221   |
|                         | -0.8   | 0.89     | 302    | 0.947 | 367      | 315    | 0.904 | 315      |       |       |          |       |       |          | 0.946 | 364   |



Table A8: CI Coverage rates and median width for incremental Cost, QALYs, and INB, across scenarios with 70% non-compliance, high correlation between outcomes and sample size  $n = 100$ . uBGN was not applied in settings with normal cost data.

| Cost distribution | $\rho$ | 2sls     |       | 3sls     |       | uBN      |       | uBGN     |       | BFL      |       |
|-------------------|--------|----------|-------|----------|-------|----------|-------|----------|-------|----------|-------|
|                   |        | coverage | width | coverage | width | coverage | width | coverage | width | coverage | width |
| <b>Normal</b>     |        |          |       |          |       |          |       |          |       |          |       |
| <b>Cost</b>       |        |          |       |          |       |          |       |          |       |          |       |
|                   | 0.8    | 0.972    | 0.546 | 0.972    | 0.546 | 0.982    | 1.29  |          |       | 0.988    | 1.09  |
|                   | -0.8   | 0.970    | 0.550 | 0.970    | 0.550 | 0.99     | 1.36  |          |       | 0.988    | 1.07  |
| <b>QALYs</b>      |        |          |       |          |       |          |       |          |       |          |       |
|                   | 0.8    | 0.97     | 0.269 | 0.97     | 0.269 | 0.982    | 0.64  |          |       | 0.966    | 0.443 |
|                   | -0.8   | 0.966    | 0.272 | 0.966    | 0.272 | 0.989    | 0.662 |          |       | 0.960    | 0.446 |
| <b>INB</b>        |        |          |       |          |       |          |       |          |       |          |       |
|                   | 0.8    | 1        | 975   | 0.973    | 495   | 1        | 1322  |          |       | 0.993    | 1032  |
|                   | -0.8   | 0.875    | 981   | 0.966    | 1284  | 0.936    | 1858  |          |       | 0.957    | 2096  |
| <b>Gamma</b>      |        |          |       |          |       |          |       |          |       |          |       |
| <b>Cost</b>       |        |          |       |          |       |          |       |          |       |          |       |
|                   | 0.8    | 0.967    | 1.68  | 0.967    | 1.68  | 0.95     | 2.51  | 0.921    | 1.82  | 0.967    | 2.77  |
|                   | -0.8   | 0.965    | 1.70  | 0.965    | 1.70  | 0.965    | 2.75  | 0.904    | 1.88  | 0.964    | 2.80  |
| <b>QALYs</b>      |        |          |       |          |       |          |       |          |       |          |       |
|                   | 0.8    | 0.969    | 0.268 | 0.969    | 0.268 | 0.984    | 0.609 | 0.935    | 0.315 | 0.967    | 0.430 |
|                   | -0.8   | 0.966    | 0.272 | 0.966    | 0.272 | 0.989    | 0.626 | 0.930    | 0.324 | 0.958    | 0.440 |
| <b>INB</b>        |        |          |       |          |       |          |       |          |       |          |       |
|                   | 0.8    | 1        | 1871  | 0.963    | 1175  | 0.992    | 2233  | 0.947    | 1397  | 0.975    | 1964  |
|                   | -0.8   | 0.895    | 1885  | 0.965    | 2383  | 0.908    | 3096  | 0.903    | 2631  | 0.954    | 3867  |
| <b>Inverse</b>    |        |          |       |          |       |          |       |          |       |          |       |
| <b>Gaussian</b>   |        |          |       |          |       |          |       |          |       |          |       |
|                   | 0.8    | 0.96     | 1.92  | 0.96     | 1.92  | 0.947    | 2.92  | 0.839    | 2.03  | 0.966    | 3.42  |
|                   | -0.8   | 0.964    | 1.91  | 0.964    | 1.91  | 0.966    | 3.05  | 0.855    | 2.03  | 0.968    | 3.37  |
| <b>QALYs</b>      |        |          |       |          |       |          |       |          |       |          |       |
|                   | 0.8    | 0.963    | 0.271 | 0.963    | 0.271 | 0.983    | 0.645 | 0.906    | 0.322 | 0.999    | 0.789 |
|                   | -0.8   | 0.973    | 0.27  | 0.973    | 0.270 | 0.99     | 0.631 | 0.918    | 0.325 | 0.999    | 0.774 |
| <b>INB</b>        |        |          |       |          |       |          |       |          |       |          |       |
|                   | 0.8    | 0.998    | 2091  | 0.958    | 1417  | 0.981    | 2654  | 0.863    | 1586  | 0.990    | 3145  |
|                   | -0.8   | 0.902    | 2075  | 0.966    | 2568  | 0.912    | 3389  | 0.866    | 2755  | 0.979    | 4819  |

Table A9: CI Coverage rates and median width for incremental Cost, QALYs, and INB, across scenarios with 70% non-compliance, high correlation between outcomes and sample size  $n = 1000$ . uBGN was not applied in settings with normal cost data.

| Cost distribution       | $\rho$ | 2sls     |        | 3sls     |        | uBN      |       | uBGN     |       | BFL      |        |
|-------------------------|--------|----------|--------|----------|--------|----------|-------|----------|-------|----------|--------|
|                         |        | coverage | width  | coverage | width  | coverage | width | coverage | width | coverage | width  |
| <b>Normal</b>           |        |          |        |          |        |          |       |          |       |          |        |
| <b>Cost</b>             |        |          |        |          |        |          |       |          |       |          |        |
|                         | 0.8    | 0.959    | 0.169  | 0.959    | 0.169  | 0.983    | 0.211 |          |       | 0.959    | 0.175  |
|                         | -0.8   | 0.952    | 0.169  | 0.952    | 0.169  | 0.991    | 0.230 |          |       | 0.954    | 0.177  |
| <b>QALYs</b>            |        |          |        |          |        |          |       |          |       |          |        |
|                         | 0.8    | 0.957    | 0.083  | 0.957    | 0.083  | 0.983    | 0.106 |          |       | 0.951    | 0.084  |
|                         | -0.8   | 0.954    | 0.083  | 0.954    | 0.083  | 0.991    | 0.115 |          |       | 0.951    | 0.085  |
| <b>INB</b>              |        |          |        |          |        |          |       |          |       |          |        |
|                         | 0.8    | 1        | 302    | 0.952    | 153    | 0.999    | 269   |          |       | 0.952    | 158    |
|                         | -0.8   | 0.873    | 302    | 0.954    | 395    | 0.931    | 369   |          |       | 0.953    | 406    |
| <b>Gamma</b>            |        |          |        |          |        |          |       |          |       |          |        |
| <b>Cost</b>             |        |          |        |          |        |          |       |          |       |          |        |
|                         | 0.8    | 0.952    | 0.527  | 0.952    | 0.527  | 0.938    | 0.514 | 0.890    | 0.442 | 0.948    | 0.535  |
|                         | -0.8   | 0.950    | 0.525  | 0.95     | 0.525  | 0.954    | 0.556 | 0.904    | 0.449 | 0.949    | 0.542  |
| <b>QALYs</b>            |        |          |        |          |        |          |       |          |       |          |        |
|                         | 0.8    | 0.958    | 0.0833 | 0.958    | 0.0833 | 0.986    | 0.108 | 0.923    | 0.076 | 0.952    | 0.0841 |
|                         | -0.8   | 0.951    | 0.0832 | 0.951    | 0.0832 | 0.992    | 0.115 | 0.930    | 0.077 | 0.947    | 0.0843 |
| <b>INB</b>              |        |          |        |          |        |          |       |          |       |          |        |
|                         | 0.8    | 0.998    | 583    | 0.953    | 368    | 0.986    | 479   | 0.923    | 336   | 0.950    | 374    |
|                         | -0.8   | 0.888    | 582    | 0.953    | 734    | 0.902    | 627   | 0.904    | 627   | 0.951    | 753    |
| <b>Inverse Gaussian</b> |        |          |        |          |        |          |       |          |       |          |        |
| <b>Cost</b>             |        |          |        |          |        |          |       |          |       |          |        |
|                         | 0.8    | 0.952    | 0.599  | 0.952    | 0.599  | 0.938    | 0.583 | 0.785    | 0.474 | 0.946    | 0.602  |
|                         | -0.8   | 0.959    | 0.600  | 0.959    | 0.600  | 0.962    | 0.630 | 0.786    | 0.482 | 0.955    | 0.604  |
| <b>QALYs</b>            |        |          |        |          |        |          |       |          |       |          |        |
|                         | 0.8    | 0.948    | 0.083  | 0.948    | 0.083  | 0.992    | 0.109 | 0.891    | 0.076 | 0.96     | 0.091  |
|                         | -0.8   | 0.956    | 0.083  | 0.956    | 0.083  | 0.992    | 0.115 | 0.896    | 0.077 | 0.968    | 0.091  |
| <b>INB</b>              |        |          |        |          |        |          |       |          |       |          |        |
|                         | 0.8    | 0.996    | 650    | 0.946    | 447    | 0.978    | 542   | 0.800    | 370   | 0.955    | 468    |
|                         | -0.8   | 0.899    | 650    | 0.96     | 801    | 0.915    | 694   | 0.806    | 654   | 0.958    | 807    |

Table A10: RMSE for incremental Cost, QALYs and INB across scenarios with 30% non-compliance, high correlation between outcomes and sample size  $n = 100$ . uBGN was not applied in settings with normal cost data. Numbers for INB have been rounded to the nearest integer..<sup>a</sup>

| <b>Cost distribution</b> | $\rho$       | <b>3sls<sup>b</sup></b> | <b>uBN</b> | <b>uBGN</b> | <b>BFL</b> |       |
|--------------------------|--------------|-------------------------|------------|-------------|------------|-------|
| <b>Normal</b>            | <b>Cost</b>  |                         |            |             |            |       |
|                          | 0.8          | 0.059                   | 0.060      |             | 0.060      |       |
|                          | -0.8         | 0.059                   | 0.061      |             | 0.060      |       |
|                          | <b>QALYs</b> |                         |            |             |            |       |
|                          | 0.8          | 0.029                   | 0.030      |             | 0.030      |       |
|                          | -0.8         | 0.029                   | 0.030      |             | 0.030      |       |
|                          | <b>INB</b>   |                         |            |             |            |       |
|                          | 0.8          | 54                      | 55         |             | 56         |       |
|                          | -0.8         | 137                     | 140        |             | 139        |       |
|                          | <b>Gamma</b> | <b>Cost</b>             |            |             |            |       |
|                          |              | 0.8                     | 0.192      | 0.196       | 0.194      | 0.196 |
|                          |              | -0.8                    | 0.196      | 0.200       | 0.205      | 0.200 |
| <b>QALYs</b>             |              |                         |            |             |            |       |
| 0.8                      |              | 0.029                   | 0.030      | 0.030       | 0.030      |       |
| -0.8                     |              | 0.029                   | 0.030      | 0.030       | 0.030      |       |
| <b>INB</b>               |              |                         |            |             |            |       |
| 0.8                      |              | 138                     | 141        | 137         | 141        |       |
| -0.8                     |              | 271                     | 276        | 281         | 276        |       |
| <b>Inverse Gaussian</b>  |              | <b>Cost</b>             |            |             |            |       |
|                          |              | 0.8                     | 0.226      | 0.229       | 0.272      | 0.229 |
|                          |              | -0.8                    | 0.225      | 0.228       | 0.272      | 0.228 |
|                          | <b>QALYs</b> |                         |            |             |            |       |
|                          | 0.8          | 0.029                   | 0.030      | 0.032       | 0.030      |       |
|                          | -0.8         | 0.028                   | 0.029      | 0.031       | 0.029      |       |
|                          | <b>INB</b>   |                         |            |             |            |       |
|                          | 0.8          | 175                     | 178        | 210         | 178        |       |
|                          | -0.8         | 291                     | 296        | 345         | 296        |       |

<sup>a</sup> uBN: unadjusted Bayesian Normal-Normal model; uBGN: unadjusted Bayesian Gamma-Normal models;

BFL: Bayesian Full Likelihood

<sup>b</sup> The RMSE corresponding to 2sls is identical to that for 3sls, by definition.

Table A11: RMSE for incremental Cost, QALYs and INB across scenarios with 30% non-compliance, moderate correlation between outcomes and sample size  $n = 1000$ . uBGN was not applied in settings with normal cost data. Numbers for INB have been rounded to the nearest integer.<sup>a</sup>

| <b>Cost distribution</b> | $\rho$       | <b>3sls<sup>b</sup></b> | <b>uBN</b> | <b>uBGN</b> | <b>BFL</b> |
|--------------------------|--------------|-------------------------|------------|-------------|------------|
| <b>Normal</b>            | <b>Cost</b>  |                         |            |             |            |
|                          | 0.4          | 0.018                   | 0.018      |             | 0.018      |
|                          | -0.4         | 0.018                   | 0.018      |             | 0.018      |
|                          | <b>QALYs</b> |                         |            |             |            |
|                          | 0.4          | 0.009                   | 0.009      |             | 0.009      |
|                          | -0.4         | 0.009                   | 0.009      |             | 0.009      |
|                          | <b>INB</b>   |                         |            |             |            |
|                          | 0.4          | 26                      | 26         |             | 26         |
|                          | -0.4         | 38                      | 38         |             | 39         |
|                          | <b>Gamma</b> | <b>Cost</b>             |            |             |            |
| 0.4                      |              | 0.061                   | 0.061      | 0.061       | 0.061      |
| -0.4                     |              | 0.061                   | 0.061      | 0.061       | 0.061      |
| <b>QALYs</b>             |              |                         |            |             |            |
| 0.4                      |              | 0.009                   | 0.009      | 0.009       | 0.009      |
| -0.4                     |              | 0.009                   | 0.009      | 0.009       | 0.009      |
| <b>INB</b>               |              |                         |            |             |            |
| 0.4                      |              | 55                      | 55         | 56          | 55         |
| -0.4                     |              | 75                      | 75         | 76          | 75         |
| <b>Inverse Gaussian</b>  |              | <b>Cost</b>             |            |             |            |
|                          | 0.4          | 0.072                   | 0.072      | 0.075       | 0.072      |
|                          | -0.4         | 0.072                   | 0.072      | 0.076       | 0.073      |
|                          | <b>QALYs</b> |                         |            |             |            |
|                          | 0.4          | 0.009                   | 0.009      | 0.035       | 0.009      |
|                          | -0.4         | 0.009                   | 0.009      | 0.035       | 0.009      |
|                          | <b>INB</b>   |                         |            |             |            |
|                          | 0.4          | 66                      | 66         | 69          | 66         |
|                          | -0.4         | 85                      | 86         | 89          | 86         |

<sup>a</sup> uBN: unadjusted Bayesian Normal-Normal model; uBGN: unadjusted Bayesian Gamma-Normal models;

BFL: Bayesian Full Likelihood

<sup>b</sup> The RMSE corresponding to 2sls is identical to that for 3sls, by definition.

Table A12: RMSE for incremental Cost, QALYs and INB across scenarios with 30% non-compliance, high correlation between outcomes and sample size  $n = 1000$ . uBGN was not applied in settings with normal cost data. Numbers for INB have been rounded to the nearest integer.<sup>a</sup>

| <b>Cost distribution</b> | $\rho$       | <b>3sls<sup>b</sup></b> | <b>uBN</b> | <b>uBGN</b> | <b>BFL</b> |
|--------------------------|--------------|-------------------------|------------|-------------|------------|
| <b>Normal</b>            | <b>Cost</b>  |                         |            |             |            |
|                          | 0.8          | 0.019                   | 0.019      |             | 0.019      |
|                          | -0.8         | 0.018                   | 0.018      |             | 0.018      |
|                          | <b>QALYs</b> |                         |            |             |            |
|                          | 0.8          | 0.009                   | 0.009      |             | 0.009      |
|                          | -0.8         | 0.009                   | 0.009      |             | 0.009      |
|                          | <b>INB</b>   |                         |            |             |            |
|                          | 0.8          | 17                      | 17         |             | 17         |
|                          | -0.8         | 43                      | 43         |             | 44         |
|                          | <b>Gamma</b> | <b>Cost</b>             |            |             |            |
| 0.8                      |              | 0.062                   | 0.062      | 0.061       | 0.062      |
| -0.8                     |              | 0.062                   | 0.062      | 0.062       | 0.062      |
| <b>QALYs</b>             |              |                         |            |             |            |
| 0.8                      |              | 0.009                   | 0.009      | 0.009       | 0.009      |
| -0.8                     |              | 0.009                   | 0.009      | 0.009       | 0.009      |
| <b>INB</b>               |              |                         |            |             |            |
| 0.8                      |              | 44                      | 44         | 43          | 44         |
| -0.8                     |              | 85                      | 85         | 84          | 85         |
| <b>Inverse Gaussian</b>  |              | <b>Cost</b>             |            |             |            |
|                          | 0.8          | 0.073                   | 0.073      | 0.105       | 0.073      |
|                          | -0.8         | 0.072                   | 0.072      | 0.103       | 0.072      |
|                          | <b>QALYs</b> |                         |            |             |            |
|                          | 0.8          | 0.009                   | 0.009      | 0.011       | 0.009      |
|                          | -0.8         | 0.009                   | 0.009      | 0.011       | 0.009      |
|                          | <b>INB</b>   |                         |            |             |            |
|                          | 0.8          | 56                      | 56         | 80          | 56         |
|                          | -0.8         | 94                      | 94         | 132         | 94         |

Table A13: RMSE for incremental Cost, QALYs and INB across scenarios with 70% non-compliance, moderate correlation between outcomes and sample size  $n = 100$ . uBGN was not applied in settings with normal cost data. Numbers for INB have been rounded to the nearest integer.<sup>a</sup>

| <b>Cost distribution</b> | $\rho$       | <b>3sls<sup>b</sup></b> | <b>uBN</b> | <b>uBGN</b> | <b>BFL</b> |       |
|--------------------------|--------------|-------------------------|------------|-------------|------------|-------|
| <b>Normal</b>            | <b>Cost</b>  |                         |            |             |            |       |
|                          | 0.4          | 0.145                   | 0.207      |             | 0.181      |       |
|                          | -0.4         | 0.146                   | 0.203      |             | 0.182      |       |
|                          | <b>QALYs</b> |                         |            |             |            |       |
|                          | 0.4          | 0.074                   | 0.104      |             | 0.089      |       |
|                          | -0.4         | 0.074                   | 0.109      |             | 0.088      |       |
|                          | <b>INB</b>   |                         |            |             |            |       |
|                          | 0.4          | 212                     | 272        |             | 264        |       |
|                          | -0.4         | 309                     | 396        |             | 383        |       |
|                          | <b>Gamma</b> | <b>Cost</b>             |            |             |            |       |
|                          |              | 0.4                     | 0.467      | 0.565       | 0.682      | 0.559 |
|                          |              | -0.4                    | 0.456      | 0.553       | 0.636      | 0.549 |
| <b>QALYs</b>             |              |                         |            |             |            |       |
| 0.4                      |              | 0.072                   | 0.097      | 0.082       | 0.085      |       |
| -0.4                     |              | 0.073                   | 0.099      | 0.083       | 0.086      |       |
| <b>INB</b>               |              |                         |            |             |            |       |
| 0.4                      |              | 426                     | 520        | 429         | 500        |       |
| -0.4                     |              | 570                     | 697        | 758         | 687        |       |
| <b>Inverse Gaussian</b>  |              | <b>Cost</b>             |            |             |            |       |
|                          |              | 0.4                     | 0.521      | 0.622       | 0.946      | 0.622 |
|                          |              | -0.4                    | 0.516      | 0.635       | 1.096      | 0.635 |
|                          | <b>QALYs</b> |                         |            |             |            |       |
|                          | 0.4          | 0.073                   | 0.094      | 0.092       | 0.094      |       |
|                          | -0.4         | 0.074                   | 0.092      | 0.110       | 0.092      |       |
|                          | <b>INB</b>   |                         |            |             |            |       |
|                          | 0.4          | 484                     | 583        | 632         | 583        |       |
|                          | -0.4         | 630                     | 865        | 967         | 865        |       |

Table A14: RMSE for incremental Cost, QALYs and INB across scenarios with 70% non-compliance, high correlation between outcomes and sample size  $n = 100$ . uBGN was not applied in settings with normal cost data. Numbers for INB have been rounded to the nearest integer.<sup>a</sup>

| <b>Cost distribution</b> | $\rho$       | <b>3sls<sup>b</sup></b> | <b>uBN</b> | <b>uBGN</b> | <b>BFL</b> |
|--------------------------|--------------|-------------------------|------------|-------------|------------|
| <b>Normal</b>            | <b>Cost</b>  |                         |            |             |            |
|                          | 0.8          | 0.147                   | 0.201      |             | 0.180      |
|                          | -0.8         | 0.147                   | 0.209      |             | 0.182      |
|                          | <b>QALYs</b> |                         |            |             |            |
|                          | 0.8          | 0.072                   | 0.100      |             | 0.086      |
|                          | -0.8         | 0.075                   | 0.109      |             | 0.090      |
|                          | <b>INB</b>   |                         |            |             |            |
|                          | 0.8          | 131                     | 169        |             | 169        |
|                          | -0.8         | 351                     | 447        |             | 425        |
|                          | <b>Gamma</b> | <b>Cost</b>             |            |             |            |
| 0.8                      |              | 0.450                   | 0.543      | 0.604       | 0.531      |
| -0.8                     |              | 0.454                   | 0.546      | 0.563       | 0.538      |
| <b>QALYs</b>             |              |                         |            |             |            |
| 0.8                      |              | 0.072                   | 0.097      | 0.081       | 0.086      |
| -0.8                     |              | 0.073                   | 0.096      | 0.084       | 0.086      |
| <b>INB</b>               |              |                         |            |             |            |
| 0.8                      |              | 313                     | 377        | 429         | 368        |
| -0.8                     |              | 638                     | 768        | 758         | 773        |
| <b>Inverse Gaussian</b>  |              | <b>Cost</b>             |            |             |            |
|                          | 0.8          | 0.532                   | 0.637      | 0.902       | 0.637      |
|                          | -0.8         | 0.526                   | 0.635      | 1.010       | 0.635      |
|                          | <b>QALYs</b> |                         |            |             |            |
|                          | 0.8          | 0.074                   | 0.092      | 0.100       | 0.092      |
|                          | -0.8         | 0.074                   | 0.092      | 0.096       | 0.092      |
|                          | <b>INB</b>   |                         |            |             |            |
|                          | 0.8          | 395                     | 468        | 615         | 468        |
|                          | -0.8         | 704                     | 865        | 1022        | 865        |

Table A15: RMSE for incremental Cost, QALYs and INB across scenarios with 70% non-compliance, moderate correlation between outcomes and sample size  $n = 1000$ . uBGN was not applied in settings with normal cost data. Numbers for INB have been rounded to the nearest integer.<sup>a</sup>

| <b>Cost distribution</b> | $\rho$       | <b>3sls<sup>b</sup></b> | <b>uBN</b> | <b>uBGN</b> | <b>BFL</b> |
|--------------------------|--------------|-------------------------|------------|-------------|------------|
| <b>Normal</b>            | <b>Cost</b>  |                         |            |             |            |
|                          | 0.4          | 0.043                   | 0.043      |             | 0.043      |
|                          | -0.4         | 0.043                   | 0.043      |             | 0.043      |
|                          | <b>QALYs</b> |                         |            |             |            |
|                          | 0.4          | 0.022                   | 0.022      |             | 0.022      |
|                          | -0.4         | 0.022                   | 0.022      |             | 0.022      |
|                          | <b>INB</b>   |                         |            |             |            |
|                          | 0.4          | 61                      | 62         |             | 62         |
|                          | -0.4         | 90                      | 91         |             | 91         |
| <b>Gamma</b>             | <b>Cost</b>  |                         |            |             |            |
|                          | 0.4          | 0.135                   | 0.135      | 0.138       | 0.136      |
|                          | -0.4         | 0.134                   | 0.135      | 0.138       | 0.135      |
|                          | <b>QALYs</b> |                         |            |             |            |
|                          | 0.4          | 0.021                   | 0.021      | 0.021       | 0.021      |
|                          | -0.4         | 0.021                   | 0.021      | 0.021       | 0.021      |
|                          | <b>INB</b>   |                         |            |             |            |
|                          | 0.4          | 124                     | 169        | 126         | 125        |
|                          | -0.4         | 168                     | 169        | 172         | 170        |
| <b>Inverse Gaussian</b>  | <b>Cost</b>  |                         |            |             |            |
|                          | 0.4          | 0.151                   | 0.153      | 0.158       | 0.153      |
|                          | -0.4         | 0.152                   | 0.153      | 0.158       | 0.153      |
|                          | <b>QALYs</b> |                         |            |             |            |
|                          | 0.4          | 0.021                   | 0.022      | 0.022       | 0.022      |
|                          | -0.4         | 0.021                   | 0.022      | 0.022       | 0.022      |
|                          | <b>INB</b>   |                         |            |             |            |
|                          | 0.4          | 141                     | 142        | 147         | 142        |
|                          | -0.4         | 185                     | 187        | 193         | 187        |

<sup>a</sup> uBN: unadjusted Bayesian Normal-Normal model; uBGN: unadjusted Bayesian Gamma-Normal models;

BFL: Bayesian Full Likelihood

<sup>b</sup> The RMSE corresponding to 2sls is identical to that for 3sls, by definition.



Table A16: RMSE for incremental Cost, QALYs and INB across scenarios with 70% non-compliance, high correlation between outcomes and sample size  $n = 1000$ . uBGN was not applied in settings with normal cost data. Numbers for INB have been rounded to the nearest integer.<sup>a</sup>

| <b>Cost distribution</b> | $\rho$       | <b>3sls<sup>b</sup></b> | <b>uBN</b> | <b>uBGN</b> | <b>BFL</b> |       |
|--------------------------|--------------|-------------------------|------------|-------------|------------|-------|
| <b>Normal</b>            | <b>Cost</b>  |                         |            |             |            |       |
|                          | 0.8          |                         | 0.043      |             | 0.043      |       |
|                          | -0.8         | 0.043                   | 0.043      |             | 0.043      |       |
|                          | <b>QALYs</b> |                         |            |             |            |       |
|                          | 0.8          | 0.021                   | 0.021      |             | 0.021      |       |
|                          | -0.8         | 0.021                   | 0.022      |             | 0.021      |       |
|                          | <b>INB</b>   |                         |            |             |            |       |
|                          | 0.8          | 39                      | 39         |             | 39         |       |
|                          | -0.8         | 100                     | 101        |             | 101        |       |
|                          | <b>Gamma</b> | <b>Cost</b>             |            |             |            |       |
|                          |              | 0.8                     | 0.135      | 0.137       | 0.135      | 0.137 |
|                          |              | -0.8                    | 0.133      | 0.135       | 0.133      | 0.135 |
| <b>QALYs</b>             |              |                         |            |             |            |       |
| 0.8                      |              | 0.021                   | 0.022      | 0.022       | 0.021      |       |
| -0.8                     |              | 0.021                   | 0.021      | 0.021       | 0.021      |       |
| <b>INB</b>               |              |                         |            |             |            |       |
| 0.8                      |              | 95                      | 96         | 94          | 96         |       |
| -0.8                     |              | 187                     | 188        | 186         | 188        |       |
| <b>Inverse Gaussian</b>  |              | <b>Cost</b>             |            |             |            |       |
|                          |              | 0.8                     | 0.155      | 0.157       | 0.190      | 0.157 |
|                          |              | -0.8                    | 0.151      | 0.153       | 0.192      | 0.153 |
|                          | <b>QALYs</b> |                         |            |             |            |       |
|                          | 0.8          | 0.021                   | 0.021      | 0.023       | 0.021      |       |
|                          | -0.8         | 0.021                   | 0.021      | 0.023       | 0.021      |       |
|                          | <b>INB</b>   |                         |            |             |            |       |
|                          | 0.8          | 118                     | 119        | 144         | 119        |       |
|                          | -0.8         | 201                     | 203        | 250         | 203        |       |

<sup>a</sup> uBN: unadjusted Bayesian Normal-Normal model; uBGN: unadjusted Bayesian Gamma-Normal models;

BFL: Bayesian Full Likelihood

<sup>b</sup> The RMSE corresponding to 2sls is identical to that for 3sls, by definition.

## 2.1 RMSE details

The RMSE of an estimator  $\hat{\theta}$  can be defined as follows

$$\text{RMSE}(\hat{\theta}) = \sqrt{\text{E}((\hat{\theta} - \theta)^2)}$$

where  $\theta$  is the true value of the parameter.

An equivalent formulation is

$$\text{RMSE}(\hat{\theta}) = \text{Var}(\hat{\theta}) + \text{Bias}(\hat{\theta})^2,$$

with  $\text{Var}(\hat{\theta}) = \frac{1}{n_{\text{sims}}} \sum_i (\hat{\theta}_i - \bar{\theta})^2$  the empirical variance of the estimator, where  $\bar{\theta} = \frac{1}{n_{\text{sims}}} \sum_i \hat{\theta}_i$ .

From this, it is clear that since both 2sls and 3sls methods obtain the same point estimate  $\hat{\theta}$  for costs, QALYs and INB, this results in the same RMSE, under whichever definition.

On the other hand, the coverage, and the confidence interval width are calculated using the model-based standard errors  $s_i$  of the estimators. In the case of the coverage this is

$$\text{Coverage} = \frac{1}{n_{\text{sims}}} \sum_i \mathbb{1} \left( |\hat{\theta}_i - \theta| < z_{\alpha/2} s_i \right),$$

and since the two methods in question obtain different model-based SE for INB (but not for the other two outcomes), these two measures of performance are different between 2sls and 3sls.

### References

Congdon, P. (2007), *Bayesian Statistical Modelling*, 2nd ed., Wiley Series in Probability and Statistics.

Gelman, A. and Hill, J. (2006), *Data Analysis Using Regression and Multilevel/Hierarchical Models*, Analytical Methods for Social Research, Cambridge University Press.

Lunn, D. and Jackson, C. and Best, N. and Thomas, A. and Spiegelhalter, D., (2012) *The BUGS Book: A Practical Introduction to Bayesian Analysis*, Chapman & Hall/CRC Texts in Statistical Science, Taylor & Francis.
